# Supplementary material for: Long-range magnetic ordering in a metal–organic framework based on octanuclear nickel(ii) clusters
Source: Royal Society of Chemistry journal article supplement (doi:10.1039/c7dt02889j), 2017-01-01
Supplement: c7dt02889j1.pdf [file c7dt02889j1.pdf]

<Supporting Information>

**Long-range magnetic ordering in a metal-organic  
framework based on octanuclear nickel(II) clusters**

**Jun-Li Wang, Yan Bai\*, Hui Pan, Guang-Shui Zheng and Dong-Bin Dang\***

Polyoxometalate Key Laboratory of Henan Province, Institute of Molecular and  
Crystal Engineering, School of Chemistry and Chemical Engineering, Henan  
University, Kaifeng 475004, P. R. China

## **Experimental Section**

### **Materials and Methods**

All reagents were commercially available and used without further purification. Elemental analyses (C, H and N) were carried out on a Perkin-Elmer 240C analytical instrument. IR spectra were recorded in KBr pellets with a Nicolet 170 SXFT-IR spectrophotometer in the 4000–400  $\text{cm}^{-1}$  region. X-ray powder diffraction patterns were recorded on a D/max- $\gamma$  A rotating anode X-ray diffractometer with Cu sealed tube ( $\lambda = 1.54178 \text{ \AA}$ ). The thermogravimetric analyses were carried out on a Perkin-Elmer-7 thermal analyzer at a heating rate of  $10^\circ\text{C}/\text{min}$  from 25 to  $800^\circ\text{C}$ . Magnetic susceptibility data on crushed single crystals were collected over the temperature range 1.8–300.0 K using a Quantum Design MPMS-5S super-conducting quantum interference device (SQUID) magnetometer.

## Synthesis

A mixture of benzene-1,2,4-tricarboxylic acid(H<sub>3</sub>BTC) (1.0 mmol), NiSO<sub>4</sub>·6H<sub>2</sub>O (2.0 mmol), 1,3-bi(4-pyridyl)propane (bpp) (0.67 mmol), NaOH (0.5 mol/L, 6 mL) and distilled water (10 mL) was stirred for 2h. The mixture was then transferred to a 25 mL Teflon-lined steel autoclave and kept at 160 °C for 5 days under autogenous pressure. After the mixture had been slowly cooled down to room temperature, green block crystals of **1** were obtained and washed with distilled water. Yields: ca. 26% (based on Ni) for **1**. The general chemical formula sum is C<sub>44</sub>H<sub>42</sub>N<sub>4</sub>Ni<sub>3</sub>O<sub>16</sub> (1058.90). Anal. Calcd(%): C, 49.91; H, 4.00; N, 5.29. Found: C, 49.50; H, 4.36; N, 4.93. IR (cm<sup>-1</sup>, KBr pellet): 3496(s), 3390(s), 3067(s), 1599(s), 1550(s), 1505(m), 1489(s), 1427(s), 1397(s), 1344(s), 1255(w), 1225(w), 1172(w), 1139(w), 1073(w), 1024(m), 987(w), 919(w), 827(s), 813(s), 785(s), 736(m), 716(m), 767(m), 618(m), 571(m), 525(m), 493(w).

### **X-ray crystal structure determination**

X-ray single crystal diffraction data for **1** was collected on a Bruker Apex-II CCD detector with graphite monochromatized Mo-K $\alpha$  radiation ( $\lambda = 0.71073 \text{ \AA}$ ) using SMART and SAINT programs. Routine Lorentz and polarization corrections were applied. The structures were solved by direct methods of SHELXS-97 and refined by full-matrix least-squares method using the SHELXL-97 program package. All of the non-hydrogen atoms were refined with anisotropic thermal displacement coefficients. Hydrogen atoms were assigned to calculated positions using a riding model with appropriately fixed isotropic thermal parameters. Details of crystallographic data for **1** were given in Table S1.

**Table S1.** Crystal data for polymer **1**

| Chemical formula                                    | C <sub>44</sub> H <sub>42</sub> N <sub>4</sub> Ni <sub>3</sub> O <sub>16</sub>         |
|-----------------------------------------------------|----------------------------------------------------------------------------------------|
| Formula weight                                      | 1058.94                                                                                |
| Temperature (K)                                     | 273(2)                                                                                 |
| Wavelength                                          | 0.71073 Å                                                                              |
| Crystal system                                      | Trigonal                                                                               |
| Space group                                         | <i>P</i> 3c1                                                                           |
| Unit cell dimensions                                | $a = 19.403(2)$ Å<br>$b = 19.403(2)$ Å<br>$c = 21.606(5)$ Å<br>$\gamma = 120.00^\circ$ |
| Volume (Å <sup>3</sup> )                            | 7044(2)                                                                                |
| <i>Z</i>                                            | 6                                                                                      |
| Density (calculated)                                | 1.498 g cm <sup>-3</sup>                                                               |
| <i>F</i> (000)                                      | 3276                                                                                   |
| $\mu$                                               | 1.264                                                                                  |
| $\theta$ range for data collection                  | 2.30–25.05                                                                             |
| Index ranges                                        | $-20 \leq h \leq 23$ , $-22 \leq k \leq 23$ , $-25 \leq l \leq 25$                     |
| Reflections collected                               | 33281                                                                                  |
| Independent reflections                             | 4123 [ <i>R</i> <sub>int</sub> = 0.0638]                                               |
| Refinement method                                   | Full-matrix least-squares on <i>F</i> <sup>2</sup>                                     |
| Data/restraints/parameters                          | 4123/30/322                                                                            |
| Goodness of fit on <i>F</i> <sup>2</sup>            | 1.014                                                                                  |
| Final <i>R</i> indices [ <i>I</i> ≥ 2σ( <i>I</i> )] | 0.0709/0.1544                                                                          |
| <i>R</i> indices (all data)                         | 0.0955/0.1619                                                                          |
| Largest diff. peak and hole                         | 2.501 and -0.859 eÅ <sup>-3</sup>                                                      |

**Table S2.** Selected bond lengths (Å) for polymer **1**

| Bond        | length   | bond        | length   |
|-------------|----------|-------------|----------|
| Ni(1)–O(1)  | 2.063(5) | Ni(1)–O(1W) | 2.093(5) |
| Ni(1)–O(4A) | 2.069(5) | Ni(3)–O(2)  | 2.413(7) |
| Ni(1)–N(1)  | 2.070(6) | Ni(2)–O(6)  | 2.297(6) |
| Ni(1)–O(3)  | 2.077(5) | Ni(2)–O(5)  | 2.313(5) |
| Ni(1)–N(2B) | 2.084(6) |             |          |

Symmetry codes A:  $x - y, -1 + x, 1 - z$ ; B:  $1 - y, x - y, z$ .

**Table S3.** Selected bond angles (°) for polymer **1**

| bond angle        | degree   | Bond angle        | degree   |
|-------------------|----------|-------------------|----------|
| O(1)–Ni(1)–O(4A)  | 175.5(2) | O(1)–Ni(1)–O(1W)  | 82.6(2)  |
| O(1)–Ni(1)–N(1)   | 91.2(2)  | O(4A)–Ni(1)–O(1W) | 93.1(2)  |
| O(4A)–Ni(1)–N(1)  | 90.4(2)  | N(1)–Ni(1)–O(1W)  | 92.0(2)  |
| O(1)–Ni(1)–O(3)   | 89.2(2)  | O(3)–Ni(1)–O(1W)  | 82.7(2)  |
| O(4A)–Ni(1)–O(3)  | 88.8(2)  | N(2B)–Ni(1)–O(1W) | 173.1(2) |
| N(1)–Ni(1)–O(3)   | 174.6(2) | O(6D)–Ni(2)–O(6)  | 98.6(2)  |
| O(1)–Ni(1)–N(2B)  | 96.1(2)  | O(6)–Ni(2)–O(5D)  | 132.3(2) |
| O(4A)–Ni(1)–N(2B) | 88.0(2)  | O(6)–Ni(2)–O(5)   | 56.7(2)  |
| N(1)–Ni(1)–N(2B)  | 94.8(2)  | O(6C)–Ni(2)–O(5)  | 123.2(2) |
| O(3)–Ni(1)–N(2B)  | 90.5(2)  | O(5D)–Ni(2)–O(5)  | 100.2(2) |

Symmetry codes A:  $x - y, -1 + x, 1 - z$ ; B:  $1 - y, x - y, z$ ; C:  $2 - y, x - y, z$ ; D:  $2 - x + y, 2 - x, z$ .

**Table S4.** Hydrogen bonding interactions (Å, °) of polymer **1**

| D-H...A             | <i>d</i> (D-H) | <i>d</i> (H...A) | <i>d</i> (D...A) | ∠(DHA) | Symmetry<br>Transformation for A |
|---------------------|----------------|------------------|------------------|--------|----------------------------------|
| O(1W)-H(1WC)...O(2) | 0.85           | 2.39             | 3.196(9)         | 158    | $1 - y, -1 + x - y, z$           |
| O(1W)-H(1WD)...O(3) | 0.85           | 1.84             | 2.638(7)         | 156    | $x - y, -1 + x, 1 - z$           |
| C(9)-H(9A)...O(1)   | 0.93           | 2.48             | 3.359(9)         | 158    | $2 - x, 1 - x + y, 1/2 - z$      |
| C(21)-H(21A)...O(4) | 0.93           | 2.51             | 3.022(10)        | 115    | $y, 1 - x + y, 1 - z$            |



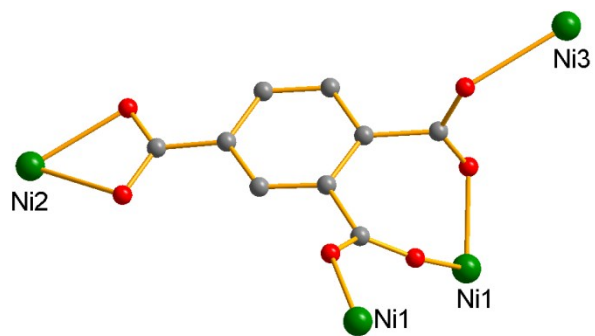

**Scheme S1.** Coordination modes of BTC<sup>3-</sup> anion in polymer **1**.

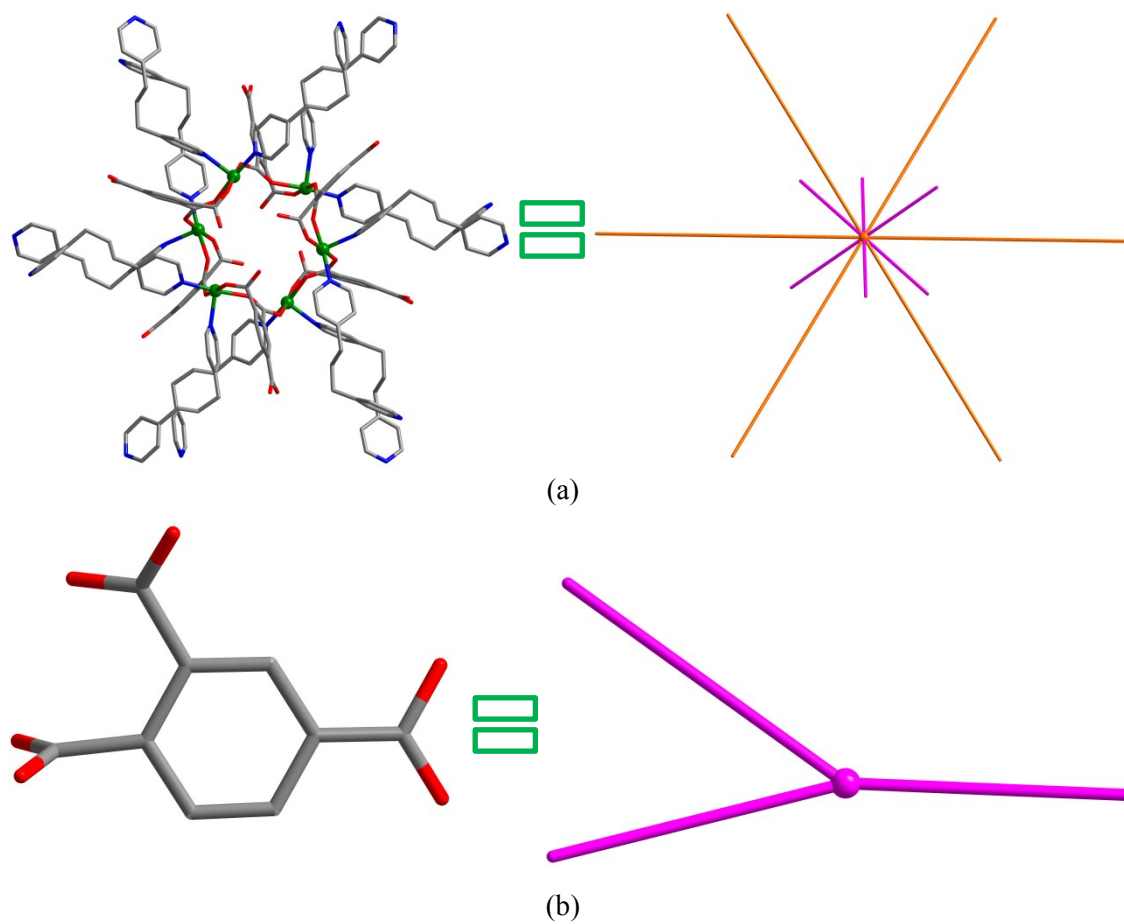

**Fig.S1** (a) Schematic illustration of 12-connected  $\text{Ni}(1)_6(\text{COO})_{12}$  unit connected with six  $\text{Ni}(1)_6(\text{COO})_{12}$  units and six  $\text{Ni}(2)$  atoms; (b) Schematic illustration of 3-connected  $\text{BTC}3^-$  ligand bonded to one  $\text{Ni}(1)_6(\text{COO})_{12}$  unit and two  $\text{Ni}(\text{II})$  atoms ( $\text{Ni}(2)$  and  $\text{Ni}(3)$ ).

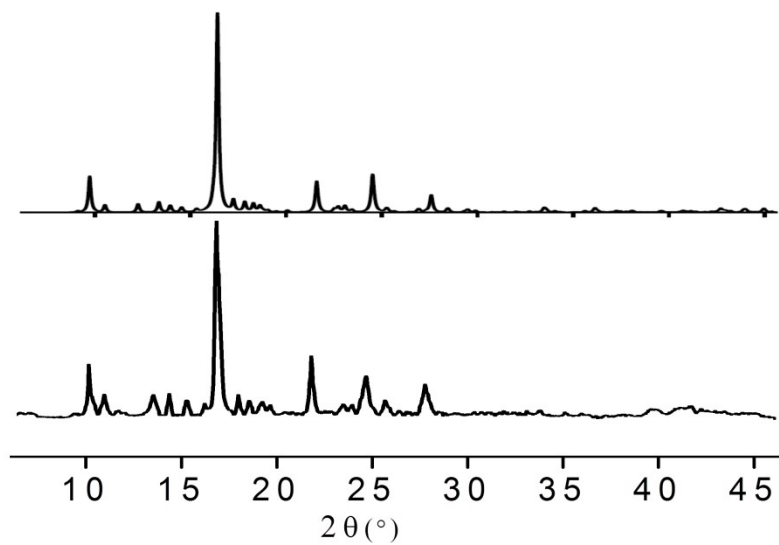

**Fig. S2** The pattern calculated from the single-crystal data for **1** (top) and the powder X-ray diffraction pattern of the samples (bottom).

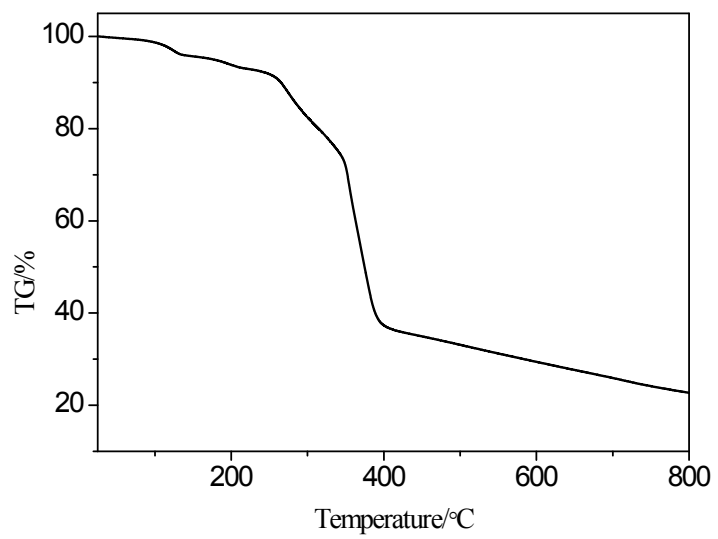

**Fig. S3** Thermogravimetric analysis (TGA) curve for polymer **1**.

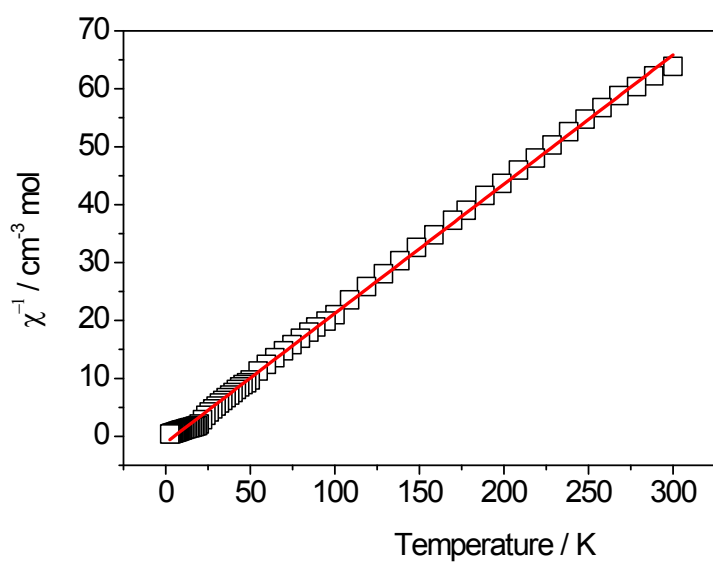

**Fig. S4** Plot of  $\chi^{-1}$  vs. T of **1**. The solid line is the best fit to the Curie-Weiss law.
